1 **Analyses of the complete genome sequence of 2,6-dichlorobenzamide (BAM) degrader**  
2 ***Aminobacter* sp. MSH1 suggests a polyploid chromosome, phylogenetic reassignment, and**  
3 **functions of (un)stable plasmids.**

4 **Running title: Complete genome of *Aminobacter* sp. MSH1**

## 5 **Authors**

6 Tue Kjærgaard Nielsen<sup>a†</sup>, Benjamin Horemans<sup>b†</sup>, Cedric Lood<sup>c,d</sup>, Jeroen T'Syen<sup>e</sup>, Vera van Noort<sup>c</sup>,  
7 Rob Lavigne<sup>d</sup>, Lea Ellegaard-Jensen<sup>f</sup>, Ole Hylling<sup>f</sup>, Jens Aamand<sup>g</sup>, Dirk Springael<sup>e,‡\*</sup>, Lars  
8 Hestbjerg Hansen<sup>a,‡\*</sup>

9 †These authors contributed equally to the work presented

10 ‡DS and LHH initiated the study and supervised the project equally in separate labs

## 11 **Institutional Affiliation**

12 <sup>a</sup> University of Copenhagen, Faculty of Science, Department of Plant and Environmental Sciences,  
13 Section for Microbiology and Biotechnology, Copenhagen, Denmark

14 <sup>b</sup> BAT Knowledge Centre, Sustainable Materials Unit, Vlaams Instituut voor Technologisch  
15 Onderzoek, Mol, Belgium

16 <sup>c</sup> KU Leuven, Faculty of Bioscience Engineering, Department of Microbial and Molecular Systems  
17 (M<sup>2</sup>S), Centre of Microbial and Plant Genetics, Leuven, Belgium

18 <sup>d</sup> KU Leuven, Faculty of Bioscience Engineering, Department of Biosystems, Laboratory of Gene  
19 Technology, Leuven, Belgium

20 <sup>e</sup> KU Leuven, Faculty of Bioscience Engineering, Department of Earth and Environmental  
21 Sciences, Division of Soil and Water Management, Leuven, Belgium

22 <sup>f</sup> Aarhus University, Department of Environmental Science, Section of Environmental  
23 Microbiology and Circular Resource Flow, Roskilde, Denmark

24 <sup>g</sup> Geological Survey of Denmark & Greenland (GEUS), Department of Geochemistry,  
25 Copenhagen, Denmark

## 26 **Corresponding authors**

27 \* Professor Dirk Springael

28 KU Leuven

29 Faculty of Bioscience Engineering

30 Department of Earth and Environmental Sciences

31 Division of Soil and Water Management

32 Kasteelpark Arenberg 20 bus 2459

33 3001 Leuven

34 Phone: +32 16321604

35 E-mail: [dirk.springael@kuleuven.be](mailto:dirk.springael@kuleuven.be)

36 and

37 \* Professor Lars H. Hansen

38 Microbial Ecology and Biotechnology

39 Department of Plant and Environmental Sciences

40 University of Copenhagen

41 Thorvaldsensvej 40

42 1871 Frederiksberg, Denmark

43 Mobile: +45 28752053

44 E-mail: [lhha@plen.ku.dk](mailto:lhha@plen.ku.dk)

## 45 **Abstract**

46 *Aminobacter* sp. MSH1 (CIP 110285) can use the pesticide dichlobenil and its transformation  
47 product, the recalcitrant groundwater micropollutant, 2,6-dichlorobenzamide (BAM) as sole  
48 source of carbon, nitrogen, and energy. The concentration of BAM in groundwater often exceeds  
49 the threshold limit for drinking water, resulting in the use of additional treatment in drinking water  
50 treatment plants (DWTPs) or closure of the affected abstraction wells. Biological treatment with  
51 MSH1 is considered a potential sustainable alternative to remediate BAM-contamination in  
52 drinking water production. Combining Illumina and Nanopore sequencing, we here present the  
53 complete genome of MSH1, which was determined independently in two different laboratories.  
54 Unexpectedly, divergences were observed between the two genomes, i.e. one of them lacked four  
55 plasmids compared to the other. Besides the circular chromosome and the two previously  
56 described plasmids involved in BAM catabolism pBAM1 (41 kb) and pBAM2 (54 kb), we observe  
57 that the genome of MSH1 contains two megaplasmids pUSP1 (367 kb) and pUSP2 (366 kb) and  
58 three smaller plasmids pUSP3 (97 kb), pUSP4 (64 kb), and pUSP5 (32 kb). The MSH1 substrain  
59 from KU Leuven showed a reduced genome lacking plasmids pUSP2 and the three smaller

60 plasmids and was designated substrain MK1, whereas the variant with all plasmids was designated  
61 as substrain DK1. Results of a plasmid stability experiment, indicate that strain MSH1 may have  
62 a polyploid chromosome when growing in R2B medium with more chromosomes than plasmids  
63 per cell. Based on phylogenetic analyses, strain MSH1 is reassigned as *Aminobacter niigataensis*  
64 MSH1.

## 65 **Importance**

66 The complete genomes of the two MSH1 substrains, DK1 and MK1, provide further insight into  
67 this already well-studied organism with bioremediation potential. The varying plasmid contents in  
68 the two substrains suggest that some of the plasmids are unstable, although this is not supported  
69 by the herein described plasmid stability experiment. Instead, results suggest that MSH1 is  
70 polyploid with respect to its chromosome, at least under some growth conditions. As the essential  
71 BAM-degradation genes are found on some of these plasmids, stable inheritance is essential for  
72 continuous removal of BAM. Finally, *Aminobacter* sp. MSH1 is reassigned as *Aminobacter*  
73 *niigataensis* MSH1, based on phylogenetic evidence.

## 74 **Keywords**

75 *Aminobacter*, 2,6-dichlorobenzamide, *Phyllobacteriaceae*, Nanopore sequencing, catabolic  
76 plasmids

## 77 **Introduction**

78 The occurrence of organic micropollutants in different water compartments threatens both  
79 ecosystem functioning as well as future drinking water supplies (1). Organic micropollutants are

80 organic chemicals with complex and highly variable structures, and they have in common that they  
81 occur in the environment at trace concentrations (in the  $\mu\text{g} - \text{ng/L}$  range). Organic micropollutants  
82 often have unknown ecotoxicological and/or human health effects. They include a multitude of  
83 compounds such as pharmaceuticals, pesticides, ingredients of household products and additives  
84 of personal care products. In the European Union, the threshold limit for pesticides and relevant  
85 transformation products in drinking water is set at  $0.1 \mu\text{g/L}$  (2). This threshold is frequently  
86 exceeded and forces drinking water treatment plants to invest in expensive physicochemical  
87 treatment technologies or to close groundwater extraction wells (3). The use of pollutant degrading  
88 bacteria in bioaugmentation strategies to remove micropollutants, such as pesticides, from drinking  
89 water, is presented as a solution (3,4). The groundwater micropollutant 2,6-dichlorobenzamide  
90 (BAM), a transformation product of the herbicide dichlobenil, frequently occurs in groundwater  
91 in Europe, often exceeding the threshold concentration (5). *Aminobacter* sp. MSH1 (CIP 110285)  
92 was enriched and isolated from dichlobenil treated soil sampled from the courtyard of a plant  
93 nursery in Denmark. The strain converts dichlobenil to BAM, which is further fully mineralized  
94 (6). Efforts to elucidate the catabolic pathway for BAM degradation in MSH1 revealed the  
95 involvement of two plasmids. The first step of BAM-mineralization involves the hydrolysis of  
96 BAM to 2,6-dichlorobenzoic acid (2,6-DCBA) by the amidase BbdA encoded on the 41 kb IncP1-  
97  $\beta$  plasmid pBAM1 (7). Further catabolism of 2,6-DCBA to central metabolism intermediates  
98 involves enzymes encoded on the 54 kb *repABC* family plasmid pBAM2. The strain mineralizes  
99 BAM at trace concentrations (6) and invades biofilms of microbial communities of rapid sand  
100 filters used in DWTPs (8). Moreover, it was successfully used in bioaugmentation of rapid sand  
101 filters, both in lab scale and pilot scale biofiltration systems, to remove BAM from (ground)water  
102 (8–11). On the other hand, long-term population persistence and catabolic activity in the sand

103 filters were impeded, likely due to a combination of predation and wash out (11, 12), as well as  
104 to physiological and genetic changes. Reducing flow rate and improving inoculation strategy have  
105 demonstrated prolonged persistence and activity of MSH1 in bioaugmented sand filters (13).  
106 However, other studies indicate that MSH1 shows a starvation survival response, in the nutrient  
107 (especially carbon) limiting environment of DWTPs, leading to reduced specific BAM degrading  
108 activity (14). Moreover, a substantial loss of plasmid pBAM2 was observed upon prolonged  
109 transfer of MSH1 both in R2A medium and in C-limited minimal medium (15), indicating that  
110 the plasmid is not entirely stable. Moreover, mutants lacking the ability to convert BAM into 2,6-  
111 DCBA have been reported (7). Clearly, to come to full management of bioaugmentation using  
112 MSH1 in DWTP biofiltration units aiming at BAM removal, more knowledge is needed on the  
113 physiological as well as genetic adaptations of MSH1 when introduced into the corresponding  
114 oligotrophic environment. The elucidation of the full genome sequence is crucial in this.

115 The complete genome sequence presented in this study shows that MSH1 substrain DK1 has a  
116 single chromosome and seven plasmids, including the two previously described catabolic plasmids  
117 pBAM1 and pBAM2, while substrain MK1 lacks four of these plasmids. The relative sequence  
118 coverage of the plasmids compared to the chromosome suggested that there are either multiple  
119 copies of the chromosome per cell or that there are, on average, fewer than one copy of six out of  
120 the seven plasmids per cell. This was tested in a plasmid stability experiment with substrain DK1  
121 where plasmids were found to be overall stable, with the exception of a single loss event of pUSP1.  
122 This supports the hypothesis that MSH1 might have a polyploid chromosome, at least under some  
123 growth conditions.

## 124 **Material and Methods**

### 125 *Growth conditions, genomic DNA preparation and sequencing*

126 The genome sequence of strain MSH1 was independently obtained in two different laboratories,  
127 i.e., the KU Leuven in Belgium (MK1) and the Aarhus University lab in Roskilde, Denmark (DK1).  
128 In both cases, *Aminobacter* sp. MSH1 was obtained from the strain collection of the laboratory  
129 that originally isolated the bacterium (6). Sequencing of substrain DK1 at the Roskilde lab was  
130 performed as follows. Directly derived from a cryostock obtained from the original lab of MSH1,  
131 two ml of a culture grown in R2B were used for extraction of high molecular weight (HMW) DNA  
132 using the MasterPure™ DNA Purification Kit (Epicentre, Madison, WI, USA), using the kit's  
133 protocol for cell samples. DNA was eluted in 35 µL 10 mM Tris-HCl (pH 7.5) with 50 mM NaCl.  
134 The purity and concentration of extracted DNA were measured with a NanoDrop 2000c and a  
135 Qubit® 2.0 fluorometer (Thermo Fisher Scientific, Walther, MA, USA), respectively. An Illumina  
136 Nextera XT library was prepared for paired-end sequencing on an Illumina NextSeq 500 with a  
137 Mid Output v2 kit (300 cycles) (Illumina Inc., San Diego, CA, USA). Paired-end reads (2x151 bp)  
138 were trimmed for contaminating adapter sequences and low quality bases (<Q20) at the ends of  
139 the reads were removed using Cutadapt (v1.8.3) (16). Paired-end reads that overlapped were  
140 merged with AdapterRemoval (v2.1.0) (17). For Oxford Nanopore sequencing, a library was  
141 prepared from the same DNA extract using the Rapid Sequencing kit (SQK-RAD004). This was  
142 loaded on an R9.4 flow cell and sequenced using MinKnow (v1.11.5) (Oxford Nanopore  
143 Technologies, Oxford, UK). Nanopore reads were basecalled with albacore (v2.1.10) without  
144 quality filtering of reads. Only reads longer than 5,000 bp were retained and sequencing adapters  
145 were trimmed using Porechop (v0.2.3). A hybrid genome assembly with Nanopore and Illumina  
146 reads was performed using Unicycler (v0.4.3) (18).

147 The Illumina sequencing of substrain MK1 in the KU Leuven lab was reported previously (7, 19).  
148 Briefly, genomic DNA was isolated from a culture grown on R2B using the Puregene Core kit A  
149 (Qiagen, Hilden, Germany), according to the manufacturer's instructions, except that DNA  
150 precipitation was performed with ethanol. A library was constructed for paired-end sequencing  
151 using 500 bp inserts and sequencing was performed on the Illumina GAIIx platform. Generated  
152 read lengths were 90 bp. The Illumina reads were quality controlled using FastQC (20) (v0.11.6)  
153 and BBduk (21) (v36.47). This included trimming the reads with low scoring regions (Phred < 30),  
154 clipping adapters, and removing very short reads (length < 50). For Nanopore sequencing, total  
155 genomic DNA was extracted from a culture grown on R2B with 200 mg/L BAM using the DNeasy  
156 UltraClean Microbial Kit (Qiagen, Hilden, Germany ). Afterwards, the genomic DNA was  
157 mechanically sheared using a Covaris g-Tube (Covaris Inc., MA, USA) to an average fragment  
158 length of 8 kb. The library for sequencing was prepared using the 1D ligation approach with native  
159 1D barcoding (SQK-LSK109) and sequenced on a MinION R9.4 flow cell using the MinION  
160 sequencer (Oxford Nanopore Technologies, Oxford, UK). The Nanopore reads were basecalled  
161 with Albacore (v2.0.2), and the barcode sequences were trimmed using Porechop (v0.2.3). Hybrid  
162 assembly of genome was performed as reported above.

### 163 *Genome analyses*

164 For both genomes, automatic gene annotation was done using Prokka (22) (v1.14.0). Separately  
165 from Prokka, proteins with transmembrane helices were identified using TMHMM v2.0 (23).  
166 Genes were assigned to COG functional categories using EggNOG-mapper v4.5.1 (24). Genome  
167 comparison was done using EDGAR (25). Metabolic pathways were explored using Pathway  
168 Tools (26) and RAST (27). Circularized views of chromosome and plasmids were made using  
169 Circos (28). MegaX (29) was used for protein alignment and tree building. Phylogenetic analysis



170 for strain MSH1 was performed using a clustal-omega (30) multiple sequence alignment using 16S  
171 ribosomal RNA genes from the set of type strains available in the *Phyllobacteriaceae* family. The  
172 tree was inferred using PhyML (31) with a GTR substitution model and a calculation of branch  
173 support values (bootstrap value of 1,000). Whole-genome-based taxonomic classification was  
174 performed with *in silico* DNA:DNA hybridization using the Type Strain Genome Server (TYGS)  
175 (32). Furthermore, average nucleotide identity (ANI) values were calculated for MSH1 against all  
176 available *Aminobacter* genomes in NCBI (downloaded January 31, 2021), using FastANI (33) and  
177 plotted in R with the *heatmap* package (34). Genomes of the two MSH1 substrains were  
178 compared using the Mauve genome alignment software (35). Plasmids were characterized with  
179 regards to relaxase genes and replicon families using MOB-suite (36).

180

#### 181 *Plasmid (in)stability experiment*

182 To test for plasmid stability, MSH1 cells from -80°C cryostock were streaked on R2A plates and  
183 DNA from 1 ml of the cryostock was extracted using MasterPure™ DNA Purification Kit. After  
184 incubation at 22°C for 11 days, a single colony from the R2A plate was picked and resuspended  
185 in 105 µl phosphate-buffered saline (PBS). From this, 5 µl suspension was inoculated in 25 ml  
186 R2B for 72 hours. Whole genome sequencing was performed on the remaining 100 µl PBS  
187 suspension. After 72 hours of growth in R2B, 1 mL broth culture was sampled for DNA extraction,  
188 similarly to the DNA extracted for initial DNA sequencing (above), and 100 µL of dilution series  
189  $10^{-5}$ - $10^{-8}$  of the R2B culture were plated onto R2A and the plates incubated at 22°C. After 7 days  
190 of growth, DNA was extracted and sequenced, as described above, from 14 individual colonies  
191 (originating from a single cell) resuspended in 100 µL PBS. All sequencing was performed on an

192 Illumina NextSeq 550 with a Mid Output v2 kit (300 cycles) using Nextera XT library preparations  
193 as described above.

194 Sequencing adapters and poor quality sequences were trimmed from paired end reads using  
195 Trimmomatic (v0.39) (37) with the options  
196 “ILLUMINACLIP:/usr/share/trimmomatic/NexteraPE-PE.fa:2:30:10 LEADING:3 TRAILING:3  
197 SLIDINGWINDOW:4:15 MINLEN:36”. Trimmed and filtered reads from each replicate MSH1  
198 sample were mapped with bwa (v0.7.17-r1198-dirty) (38) to the completely assembled MSH1  
199 genome including plasmids pBAM1-2 and pUSP1-5. Sequencing coverage in 1,000 bp windows  
200 for all replicons per replicate sample was calculated with samtools (v1.9-166-g74718c2) (39) and  
201 bedtools (v2.28.0) (40). Coverage data for all replicons were divided by the mean coverage of the  
202 chromosome, in order to normalize replicon copy numbers relative to the chromosome.  
203 Normalized coverage of all replicons for all replicates were visualized with Circos (v0.69-6) (28).

204

#### 205 *Data availability*

206 The genome sequences of strain MSH1 substrains MK1/DK1 are available under the following  
207 GenBank accession numbers CP026265/CP028968 (chromosome), CP026268/CP028967  
208 (pBAM1), CP026267/CP028966 (pBAM2), CP026266/CP028969 (pUSP1) and CP028970  
209 (pUSP2), CP028971 (pUSP3), CP028972 (pUSP4) and CP028973 (pUSP5).

## 210 **Results and discussion**

### 211 *Genome statistics*

212 The MSH1 genome (based on substrain DK1) consists of a chromosome of 5,301,518 bp and seven  
213 plasmids. The genome contains two large plasmids pUSP1 of 367,423 bp and pUSP2 of 365,485

214 bp, three smaller plasmids pUSP3, pUSP4, and pUSP5 (respectively 97,029 bp, 64,122 bp, and  
215 31,577 bp) and the two previously reported smaller catabolic plasmids pBAM1 and pBAM2 of  
216 40,559 bp and 53,893 bp, respectively (Table 1). A total of 6,257 genes could be predicted of  
217 which six rRNAs, 53 tRNAs, and four ncRNAs. A total of 6,194 CDS were predicted including  
218 190 pseudogenes (Table 2). Circular views of the chromosome and seven plasmids are shown in  
219 Figure 1 and 2. The KU Leuven variant, designated as substrain MK1, lacked one of the two larger  
220 plasmids, i.e. pUSP2, and the three smaller plasmids pUSP3, pUSP4, and pUSP5. Except for the  
221 discrepancy in plasmids, the shared genomes (chromosome, pUSP1, pBAM1, and pBAM2) of the  
222 two strains have an average nucleotide identity of 99.9925%. The BAM-catabolic genes were  
223 manually checked for mutations that could indicate differences in degradation potential. A single  
224 nucleotide change was noted in the *bldb3* gene on pBAM2, encoding one of three subunits of a  
225 TRAP-type transport system potentially involved in the uptake of 2,6-DCBA (19). In this gene, a  
226 non-synonymous substitution has changed a glycine to an arginine in the resulting protein in MK1.  
227 Currently, it is not known if this change has an effect on the putative function of this tripartite  
228 transport system. Furthermore, differences were found in the region of plasmid pUSP1 containing  
229 an IS30 family insertion sequence with 38 bp flanking, imperfect, inverted repeats (IRs). The  
230 repeats appear complete in DK1, but MK1 shows a deletion of 56 bp and 34 bp up- and  
231 downstream of the IS30 transposase gene, including partial deletion of the IR at both ends,  
232 suggesting that the MK1 substrain has undergone further genetic changes. The deletions flanking  
233 the IS30 element on pUSP1 in MK1 may have been caused by a possible intramolecular  
234 transposition event (41). However, this IS30 element with deletion in the IRs in MK1 may still be  
235 functional, as the functional core region of IS30 IRs are only part of the complete IR (42).

236

237 *Phylogenetic assignment of MSH1 to Aminobacter niigataensis*

238 A phylogenetic tree based on the 16S rRNA gene sequence indicating the position of MSH1 is  
239 shown in Figure 3. The 1,463 bp 16S rRNA gene sequence of MSH1 is 100% identical to that of  
240 *Aminobacter niigataensis* DSM 7050<sup>T</sup> and 99.6-99.8% to those of other *Aminobacter* species. This  
241 is supported by whole-genome *in silico* digital DNA:DNA hybridization using TYGS, which  
242 reports that MSH1 (substrain DK1) is 82.5% (recommended  $d_4$  formula) similar to *A. niigataensis*  
243 DSM 7050. (Supplementary Table S1). Finally, ANI values against all available *Aminobacter*  
244 genomes from NCBI (complete and incomplete assemblies; downloaded January 31, 2021),  
245 showed an ANI of 98% against *A. niigataensis* DSM 7050 (Figure 4). Based on these analyses, we  
246 reassign *Aminobacter* sp. MSH1 as *Aminobacter niigataensis* MSH1.

247

248 *Chromosomally encoded metabolic features of MSH1*

249 The chromosome of MSH1 possesses all genes required for glycolysis using the Embden-  
250 Meyerhof pathway and additionally possesses all genes for glucose metabolism through the  
251 Entner-Doudoroff pathway and the pentose phosphate pathway. It also contains all genes of the  
252 tricarboxylic acid cycle. MSH1 was previously shown to grow slower on succinate and acetic acid  
253 as carbon sources compared to glucose, fructose, and glycerol (43). MSH1 does not possess genes  
254 involved in carbon fixation which rules out autotrophic growth. MSH1 further displays the  
255 catechol *ortho*-cleavage pathway (44) and possesses genes for conversion of benzoate to catechol  
256 allowing the organism to grow on benzoate which was confirmed by culturing the strain on  
257 benzoate (data not shown). With regards to nitrogen metabolism, MSH1 contains a gene cluster

258 that encodes the transmembrane ammonium channel AmtB as well as its cognate protein GlnK  
259 (45) for controlling ammonium influx in response to the intracellular nitrogen status, indicating  
260 that MSH1 can use mineral ammonia as a nitrogen source directly from its environment. In  
261 addition, MSH1 encodes for proteins involved in nitrate transport (NrtA and NrtT). The  
262 corresponding genes are located upstream of genes for assimilatory nitrate reduction (*nasDEA*) to  
263 ammonium suggesting that MSH1 can also use nitrate as a nitrogen source. Finally, ammonia is  
264 also released from amino acid metabolism and is further incorporated in L-glutamate for  
265 biosynthesis. Furthermore, MSH1 contains a gene cluster which combines a periplasmic  
266 dissimilatory nitrate reductase (*napAB*), the membrane-bound cytochrome *c* (*napC*) that is  
267 involved in electron transfer from the quinol pool in the cytoplasmic membrane to NapAB, *nirK*  
268 (nitrate reductase) and *norBC* (nitrite oxide reductase). However, *narG*, encoding the cytoplasmic  
269 oriented dissimilatory nitrate reductase, is lacking. Dissimilatory nitrate reductases are associated  
270 with the cell membrane, and are typically involved in energy acquisition, detoxification, and redox  
271 regulation (46) NarG, located at the cytoplasmic side of the cell membrane, is the typical  
272 respiratory nitrate reductase though its function can be replaced by NapAB in cases coupled to  
273 formate oxidation (46). However, this is unlikely since MSH1 is unable to grow under nitrate  
274 reducing conditions (6). In addition, *nosZ* for reduction of nitrous oxide to dinitrogen (47) is  
275 missing. The exact function of the gene cluster containing *napABC*, *nirK* and *norBC* is yet  
276 unknown. Besides direct uptake, for sulfur metabolism, MSH1 possesses two nearby located gene  
277 clusters encoding the ABC transporter complex CysUWA involved in sulfate/thiosulfate import.  
278 One of the two clusters appears directed to the uptake of sulfate while the other to thiosulfate  
279 uptake, since they respectively are linked with *sbp* and *cysP* (48). Both genes encode for the  
280 periplasmic protein that delivers sulfate or thiosulfate to the ABC transporter for high affinity

281 uptake but Sbp binds sulfate and CysP thiosulfate. Furthermore, the chromosome contains all  
282 genes necessary for assimilatory sulfate reduction. The pathway reduces sulfate to sulfide  
283 involving ATP sulfurylase (CysND), adenosine 5'-phosphosulfate reductase (CysC), 3'-  
284 phosphoadenosine-5'-phosphosulfate reductase (CysH) and sulfite reductase (CisIJ). In addition,  
285 MSH1 contains *cysK* encoding O-acetylserine sulfhydrylase that incorporates sulfide into O-  
286 acetylserine to form cysteine (48). The assimilation of thiosulfate is less clear but MSH1 encodes  
287 for another homologue of CysK as well as several glutaredoxin proteins that are needed to  
288 incorporate thiosulfate in O-acetylserine and reductive cleavage reaction of its disulfide bond to  
289 form cysteine (48).

290

#### 291 *Plasmids of MSH1*

292 Besides the previously described IncP1- $\beta$  and *repABC* plasmids, pBAM1 and pBAM2 (7, 19),  
293 substrain DK1 harbors the five pUSP1-5 plasmids (Figure 2), while substrain MK1 lacks pUSP2,  
294 pUSP3, pUSP4, and pUSP5. Catabolic genes on pBAM1 and pBAM2 enable MSH1 to mineralize  
295 the groundwater micropollutant BAM and use it as a source of carbon, nitrogen, and energy for  
296 growth. The amidase BbdA on pBAM1 transforms BAM to 2,6-dichlorobenzoic acid (DCBA) (7)  
297 which is further metabolized by a series of catabolic enzymes encoded by pBAM2 (19, 49). As  
298 previously discussed (19), the gene *bbdI* encoding the glutathione dependent thiolytic  
299 dehalogenase responsible for removal of one of the chlorines from BAM together with *bbdJ*  
300 encoding glutathione reductase, occur on pBAM2 in three consecutive, perfect repeats followed  
301 by a fourth, imperfect repeat. This, together with the placement of the BAM degradation genes on  
302 two separate plasmids (pBAM1 and pBAM2) and the bordering of the catabolic gene clusters by  
303 remnants of insertion sequences and integrase genes, suggests that the BAM catabolic genes in

304 MSH1 have been acquired by horizontal gene transfer and then evolved to occur in their observed  
305 genomic organisation. In addition, pBAM2 has a considerably lower GC content of 56% compared  
306 to the chromosome and other plasmids which are between 60.0 and 64.4% (Table 2), which could  
307 indicate that pBAM2 was acquired from another, unknown, unrelated bacterium. It was previously  
308 shown that mineralization of DCBA is a common trait in bacteria in sand filters and soils, while  
309 BAM to DCBA conversion is the rate limiting step in BAM mineralization and is rare in microbial  
310 communities (50).

311 Like pBAM2, plasmids pUSP1, pUSP2, and pUSP3 belong to the *repABC* family. *repABC*  
312 replicons are known as typical genome components of *Alphaproteobacteria* species (51). The  
313 occurrence of more than one *repABC* replicon in one and the same genome has been described  
314 before and the plasmid family has been shown to exist of different incompatibility groups. For  
315 instance, *Rhizobium etli* CFN42 has 6 *repABC* plasmids (52, 53).

316 Plasmids pBAM2, pUSP2, pUSP3, and pUSP4 contains Type IV secretion system (T4SS) genes  
317 (54), while pUSP1 does not. This indicates that pUSP1 is likely not self-transferable, unlike  
318 pBAM2, pUSP2, pUSP3, and pUSP4. Besides T4SS genes, plasmid pUSP4 contains a *mobABC*  
319 operon. The 31.6 kbp plasmid pUSP5 lacks conjugative transfer genes and appears to be a  
320 mobilizable plasmid with genes encoding a VirD4-like coupling protein and a TraA conjugative  
321 transfer relaxase likely involved in nicking at an *oriT* site and unwinding DNA before transfer.  
322 Furthermore, MOB-suite predicted that pBAM1, pUSP2, and pUSP4 have MOBP-type relaxase  
323 genes, while pUSP3 and pUSP5 have MOBQ-type relaxase genes. pBAM2 and pUSP1 were not  
324 predicted to have MOB-related genes.

325

326

327 *Specialized functions of plasmids pUSP1-5*

328 In Table 3, all CDS of the different plasmids are categorized according to COGs. Half of the CDS  
329 annotated on plasmid pUSP1 (322 CDS) and pUSP2 (346 CDS) are genes primarily associated  
330 with the transport and metabolism of amino acids (20% and 12%, resp.), carbohydrates (6% and  
331 6%, resp.) and inorganic compounds (10% and 3%, resp.), and genes for energy production and  
332 conversion (9% and 8%, resp.). For the plasmids pUSP3, pUSP4, and pUSP5, CDS categorized  
333 under the same COGs are lower than 18%. Together, pUSP1 and pUSP2 accounts for about 17%  
334 of all genes in MSH1 related to amino acid, carbohydrate transport and metabolism, and energy  
335 production and conversion in MSH1. The transport systems encoded by pUSP1 and pUSP2 include  
336 multiple ABC-transporters for N and/or S-containing organic compounds. For amino acids,  
337 carbohydrates and inorganic compound metabolism and transport, ABC-type transport systems are  
338 predicted for polar amino acids (arginine, glutamine), branched chain amino acids, and multiple  
339 sugars. In addition, transport systems for spermidine/putrescine, taurine, aliphatic sulphonates,  
340 dipeptides, beta-methyl galactoside, polysialic acid, and phosphate were predicted. Putative  
341 functions could be assigned by Prokka to 64.2%, 56.8%, 27.4%, 42.2%, and 34.3% of CDS for  
342 pUSP1, pUSP2, pUSP3, pUSP4 and pUSP5, respectively. On pUSP1, found in both MSH1  
343 substrains, multiple genes could be assigned to metabolic subsystems by RAST. These include  
344 folate biosynthesis, cytochrome oxidases and reductases, degradation of aromatic compounds  
345 (homogentisate pathway), ammonia assimilation, and several genes related to amino acid  
346 metabolism. Some of these functions on pUSP1 do not have functional analogs on the chromosome,  
347 which may help to explain why pUSP1 was not lost in substrain MK1, but the other pUSP plasmids  
348 were. On pUSP2, which is absent in MK1 substrain, some genes are predicted to be involved in  
349 acetyl-CoA fermentation to butyrate, creatine degradation, metabolism of butanol, fatty acids, and



350 nitrile, and a few miscellaneous functions. A large number of CDS on pUSP1 (19%), and pUSP2  
351 (23%) are homologues to CDS on the chromosome and could be considered dispensable genes.  
352 However, although these CDS might be considered homologues, their functionality might differ  
353 considerably in terms of substrate specificity and kinetics.

354 Besides genes encoding conjugative transfer, plasmid replication, and plasmid stability  
355 functions, most genes on plasmids pUSP3, pUSP4, and pUSP5 could not be annotated with a  
356 function. However, several genes on pUSP3 may have functions related to metabolism of sugars,  
357 including inositol and mannose which were not tested in an earlier growth optimization  
358 experiment (43). On pUSP4, genes encoding a transmembrane amino acid transporter are  
359 situated next to an aspartate ammonia-lyase-encoding gene that enables conversion between  
360 aspartate and fumarate that may enter the tricarboxylic acid cycle, as described above. A  
361 cytochrome bd-type quinol oxidase, encoded by two subunit genes on pUSP5, also occurs in  
362 some nitrogen-fixing bacteria where it is responsible for removing oxygen in microaerobic  
363 conditions. Furthermore, a pseudoazurin type I blue copper electron-transfer protein is encoded  
364 by a gene on pUSP5, that may act as an electron donor in a denitrification pathway. A chromate  
365 transporter, ChrA, encoded by a gene on pUSP5 may confer resistance to chromate. Future  
366 studies should look into whether the lack of plasmids pUSP2-5 in substrain MK1 has phenotypic  
367 consequences, with regards to the predicted functions, including metabolism of sugars and  
368 aspartate, nitrogen metabolism, and resistance to chromate.

369

370

371

372 *Plasmid stability and chromosome polyploidy*

373 The Illumina sequencing coverage of several plasmids relative to the chromosome (except for  
374 pBAM1) was lower than one, i.e., approximately 0.3 to 0.6 per chromosome. This suggests that  
375 either not all cells (only three to six out of ten) contain a copy of the same plasmid due to plasmid  
376 loss or that there are multiple copies of the chromosome. Previously, in the MK1 substrain, we  
377 observed that pBAM2 is not always perfectly inherited by the daughter cells in cultures grown in  
378 R2B and R2B containing BAM (15). To observe whether plasmid instability explained the copy  
379 number relative to the chromosome in the sequenced cultures, sequencing was performed directly  
380 on the cryo stock as well as on colonies directly derived from this, mimicking the sequenced cell  
381 preparation for whole genome sequencing. We hypothesized that if certain plasmids are not stably  
382 inherited (i.e. those with copy numbers 0.3 to 0.6), only part of the cell population will harbour  
383 those plasmids and picking of multiple colonies from a plate will result in picking of some colonies  
384 that have lost one or more plasmids.

385 MSH1 was sequenced directly from the cryostock, from a single colony picked from R2A plates  
386 after spreading the cryostock, and from the broth R2B culture that had been inoculated with the  
387 same single colony from cryostock. Moreover, after spreading the latter R2B culture on an R2A  
388 plate, an additional 14 MSH1 colonies were picked for sequencing. Taking into account a plasmid  
389 coverage of 0.3 – 0.6 per chromosome, we expect that around half of the colonies would have lost  
390 one or more of the plasmids in the case of poor inheritance. However, only one of the colonies  
391 showed loss of a plasmid, i.e., plasmid pUSP1 (Figure 5) indicating polyploidy of the chromosome  
392 rather than unstable inheritance of plasmids. The loss of *repABC* megaplasmid pUSP1 shows that  
393 the possible metabolic features encoded by genes on pUSP1, as described above, are not essential  
394 for growth under these conditions, although, remarkably this is the only pUSP plasmid still present

395 in substrain MK1. Interestingly, the plasmid/chromosome-ratio varied according to the growth  
396 medium from which DNA was isolated. When growing in R2B (broth), e.g. as done for DNA  
397 extraction for genome sequencing and from cryostock and R2B culture (first and third green rings,  
398 Figure 6), all plasmids, except pBAM1, have a copy number lower than one per chromosome.  
399 When DNA was extracted from colonies grown on R2A plates (though resuspended in PBS prior  
400 to DNA extraction), plasmid copy numbers were approx. one per chromosome, except for pBAM1  
401 which has a copy number of approx. 2.5 per chromosome.

402 Except for the single loss of pUSP1, nothing here indicates unstable maintenance of plasmids and  
403 subsequent loss. Instead, our results indicate that MSH1 regulates the chromosome copy number  
404 according to whether it grows as planktonic bacteria or fixed on an agar plate. The results shown  
405 here can be explained by MSH1 being polyploid with regards to its chromosome when growing in  
406 broth media. Single-copy plasmids (e.g. pBAM2, pUSP1-5) will thereby have copy numbers lower  
407 than one relative to the chromosome, when growing in broth R2B. Polyploidy in prokaryotes have  
408 been described before, including in *Deinococcus*, *Borrelia*, *Azotobacter*, *Neisseria*, *Buchnera*, and  
409 *Desulfovibrio* (55) and may be quite overlooked in many other bacteria. *E. coli* in stationary phase  
410 was shown to have two chromosome copies after growing in rich, complex medium, but only 60%  
411 of the cells had two copies in stationary phase after slower growth in a synthetic medium (55). It  
412 was suggested that monoploidy is not typical for proteobacteria, and that many bacteria are  
413 polyploid when growing in exponential phase (55). Possible advantages offered by polyploidy  
414 include resistance to DNA damage and mutations, global regulation of gene expression by  
415 changing chromosome copy number, and finally polyploidy may enable heterozygosity in bacteria  
416 where genes mutate to cope with challenging condition while preserving a copy of the original  
417 genes. Despite the stability of the plasmids in MSH1, the MSH1 substrain MK1 lacks plasmids

418 pUSP2-5 and a loss of pBAM2 was previously observed (15). Although pBAM2 encodes its own  
419 T4SS, the multiple loss of pBAM2 and pUSP2-5 in MK1 could be hypothetically explained by  
420 some uncharacterized plasmid codependence, where one loss leads to another. The dynamics of  
421 plasmid loss that has led to formation of substrain MK1 are still unknown.

## 422 **Conclusions**

423 The full genome of *Aminobacter* sp. MSH1, re-identified here as *Aminobacter niigataensis* MSH1,  
424 consisting of a chromosome and seven plasmids, was determined combining both Nanopore and  
425 Illumina sequencing. Two smaller plasmids pBAM1 and pBAM2 were previously identified  
426 carrying the catabolic genes required for mineralization of the groundwater micropollutant BAM.  
427 Both the chromosome and the other five plasmids are described here for the first time. A plasmid  
428 stability experiment showed that most plasmids were stably maintained, with exception of a single  
429 loss event of plasmid pUSP1. Instead, the results indicate that MSH1 has a polyploid chromosome  
430 when growing in broth, thereby reducing plasmid copy numbers per chromosome to below one.  
431 When comparing the original strain MSH1 (DK1) and substrain MK1, we observed that plasmids  
432 pUSP2, pUSP3, pUSP4, and pUSP5 were below detection limits in MK1. Substrain MK1 may  
433 previously have lost these plasmids but maintained pUSP1, pBAM1, and pBAM2, thereby  
434 retaining its capacity to degrade BAM. Future studies on growth and degradation kinetics of the  
435 MSH1 and its substrain MK1 lacking several plasmids, can reveal if plasmids pUSP2-5 harbour  
436 unknown (favorable) functions or if they impose a metabolic burden on MSH1. This will help to  
437 elucidate which substrain is preferable for bioaugmentation.

## 438 **Funding**

439 This project (LHH, LEJ, OH, and JAA) was funded by MEM2BIO (Innovation Fund Denmark,  
440 contract number 5157-00004B) at Aarhus University and DS by the KU Leuven C1 project no.  
441 C14/15/043 and the BELSPO IAP-project  $\mu$ -manager no. P7/25 at KU Leuven. BH was supported  
442 by postdoctoral fellowship grant 12Q0218N and CL by an SB-FWO PhD fellowship 1S64718N.  
443 TKN was supported by AUFF NOVA project ORIGENE.

## 444 **Authors' contributions**

445 LHH, TKN, BH and DS initiated, planned, and funded the project. BH and TKN wrote the initial  
446 draft manuscript. BH, TKN, and CL performed genome sequencing, assembly annotation, and data  
447 analyses. OH performed the plasmid stability experiment. VvN, RL, DS, LEJ, JA, and LHH  
448 critically reviewed the paper, assisted in data interpretation, and coordinated experiments.

## 449 **References**

- 450 1. Schwarzenbach RP, Escher BI, Fenner K, Hofstetter TB, Johnson CA, von Gunten U,  
451 Wehrli B. 2006. The challenge of micropollutants in aquatic systems. *Science* (80- )  
452 313:1072–1077.
- 453 2. EU. 1998. Council Directive 98/83/EC of 3 November 1998 on the quality of water  
454 intended for human consumption. Counc Eur Union.
- 455 3. Benner J, Helbling DE, Kohler HP, Wittebol J, Kaiser E, Prasse C, Ternes TA, Albers  
456 CN, Aamand J, Horemans B, Springael D, Walravens E, Boon N. 2013. Is biological  
457 treatment a viable alternative for micropollutant removal in drinking water treatment  
458 processes? *Water Research* 47(16):5955-5976

- 459 4. Vandermaesen J, Horemans B, Bers K, Vandermeeren P, Herrmann S, Sekhar A,  
460 Seuntjens P, Springael D. 2016. Application of biodegradation in mitigating and  
461 remediating pesticide contamination of freshwater resources: state of the art and  
462 challenges for optimization. *Appl Microbiol Biotechnol* 100:7361-7376.
- 463 5. Björklund E, Anskjær GG, Hansen M, Styrishave B, Halling-Sørensen B. 2011. Analysis  
464 and environmental concentrations of the herbicide dichlobenil and its main metabolite 2,6-  
465 dichlorobenzamide (BAM): A review. *Sci Total Environ* 409:2343-2356.
- 466 6. Sørensen SR, Holtze MS, Simonsen A, Aamand J. 2007. Degradation and mineralization  
467 of nanomolar concentrations of the herbicide dichlobenil and Its persistent metabolite 2,6-  
468 dichlorobenzamide by *Aminobacter* spp. isolated from dichlobenil-treated soils. *Appl*  
469 *Environ Microbiol* 73:399–406.
- 470 7. T'Syen J, Tassoni R, Hansen L, Sorensen SJ, Leroy B, Sekhar A, Wattiez R, De Mot R,  
471 Springael D. 2015. Identification of the amidase BbdA that initiates biodegradation of the  
472 groundwater micropollutant 2,6-dichlorobenzamide (BAM) in *Aminobacter* sp. MSH1.  
473 *Environ Sci Technol* 49:11703–11713.
- 474 8. Horemans B, Raes B, Vandermaesen J, Simanjuntak Y, Brocatus H, T'Syen J, Degryse J,  
475 Boonen J, Wittebol J, Lapanje A, Sorensen SR, Springael D. 2016. Biocarriers improve  
476 bioaugmentation efficiency of a rapid sand filter for the treatment of 2,6-  
477 dichlorobenzamide (BAM)-contaminated drinking water. *Environ Sci Technol* 51:1616–  
478 1625.
- 479 9. Albers CN, Feld L, Ellegaard-Jensen L, Aamand J. 2015. Degradation of trace  
480 concentrations of the persistent groundwater pollutant 2,6-dichlorobenzamide (BAM) in

- 481 bioaugmented rapid sand filters. *Water Res* 83:61–70.
- 482 10. Albers CN, Jacobsen OS, Aamand J. 2013. Using 2,6-dichlorobenzamide (BAM)  
483 degrading *Aminobacter* sp. MSH1 in flow through biofilters—initial adhesion and BAM  
484 degradation potentials. *Appl Microbiol Biotechnol* 98:957–967.
- 485 11. Ellegaard-Jensen L, Albers CN, Aamand J. 2016. Protozoa graze on the 2,6-  
486 dichlorobenzamide (BAM)-degrading bacterium *Aminobacter* sp. MSH1 introduced into  
487 waterworks sand filters. *Appl Microbiol Biotechnol* 1–9.
- 488 12. Ellegaard-Jensen L, Horemans B, Raes B, Aamand J, Hansen LH. 2017. Groundwater  
489 contamination with 2,6-dichlorobenzamide (BAM) and perspectives for its microbial  
490 removal. *Appl Microbiol Biotechnol* 101(13):5235-5245.
- 491 13. Ellegaard-Jensen L, Schostag MD, Nikbakht Fini M, Badawi N, Gobbi A, Aamand J,  
492 Hansen LH. 2020. Bioaugmented Sand Filter Columns Provide Stable Removal of  
493 Pesticide Residue From Membrane Retentate. *Front. Water*.
- 494 14. Sekhar A, Horemans B, Aamand E, Vanhaecke L, Hofkens J, Springael D. 2013.  
495 Evaluation of the biofilm forming capacity of the 2, 6-dichlorobenzamide (BAM)  
496 degrading *Aminobacter* sp. strain MSH1 at macropollutant and micropollutant BAM  
497 concentrations. *Commun Agric Appl Biol Sci*. 2013;78(1):31-6
- 498 15. Horemans B, Raes B, Brocatus H, T'Syen J, Rombouts C, Vanhaecke L, Hofkens J,  
499 Springael D. 2017. Genetic (in)stability of 2,6-dichlorobenzamide catabolism in  
500 *Aminobacter* sp. strain MSH1 biofilms under carbon starvation conditions. *Appl Environ*  
501 *Microbiol* 83(11):e00137-17.
- 502 16. Martin M. 2014. Cutadapt removes adapter sequences from high-throughput sequencing

- 503 reads. EMBnet.journal.
- 504 17. Schubert M, Lindgreen S, Orlando L. 2016. AdapterRemoval v2: Rapid adapter trimming,  
505 identification, and read merging. BMC Res Notes 9:88.
- 506 18. Wick RR, Judd LM, Gorrie CL, Holt KE. 2017. Unicycler: Resolving bacterial genome  
507 assemblies from short and long sequencing reads. PLoS Comput Biol 13(6):e1005595.
- 508 19. T'Syen J, Raes B, Horemans B, Tassoni R, Leroy B, Lood C, van Noort V, Lavigne R,  
509 Wattiez R, Kohler H-PE, Springael D. 2018. Catabolism of the groundwater  
510 micropollutant 2,6-dichlorobenzamide beyond 2,6-dichlorobenzoate is plasmid encoded in  
511 *Aminobacter* sp. MSH1. Appl Microbiol Biotechnol 102:7963–7979.
- 512 20. Andrews S. 2010. FastQC - A quality control tool for high throughput sequence data.  
513 <http://www.bioinformatics.babraham.ac.uk/projects/fastqc/>. Babraham Bioinformatics.
- 514 21. Bushnell B, Rood J, Singer E. 2017. BBMerge – Accurate paired shotgun read merging  
515 via overlap. PLoS One 12(10):e0185056.
- 516 22. Seemann T. 2014. Prokka: Rapid prokaryotic genome annotation. Bioinformatics.
- 517 23. Krogh A, Larsson B, von Heijne G, Sonnhammer ELL. 2001. Predicting transmembrane  
518 protein topology with a hidden markov model: application to complete genomes. J Mol  
519 Biol 305:567–580.
- 520 24. Huerta-Cepas J, Forslund K, Coelho LP, Szklarczyk D, Jensen LJ, von Mering C, Bork P.  
521 2017. Fast Genome-Wide Functional Annotation through Orthology Assignment by  
522 eggNOG-Mapper. Mol Biol Evol 34:2115–2122.
- 523 25. Blom J, Albaum SP, Doppmeier D, Pühler A, Vorhölter F-J, Zakrzewski M, Goesmann A.  
524 2009. EDGAR: A software framework for the comparative analysis of prokaryotic



- 525 genomes. *BMC Bioinformatics* 10:154.
- 526 26. Karp PD, Latendresse M, Paley SM, Krummenacker M, Ong QD, Billington R, Kothari  
527 A, Weaver D, Lee T, Subhraveti P, Spaulding A, Fulcher C, Keseler IM, Caspi R. 2016.  
528 Pathway Tools version 19.0 update: software for pathway/genome informatics and  
529 systems biology. *Brief Bioinform* 17:877–890.
- 530 27. Aziz RK, Bartels D, Best A, DeJongh M, Disz T, Edwards RA, Formsma K, Gerdes S,  
531 Glass EM, Kubal M, Meyer F, Olsen GJ, Olson R, Osterman AL, Overbeek RA, McNeil  
532 LK, Paarmann D, Paczian T, Parrello B, Pusch GD, Reich C, Stevens R, Vassieva O,  
533 Vonstein V, Wilke A, Zagnitko O. 2008. The RAST Server: Rapid annotations using  
534 subsystems technology. *BMC Genomics* 9:75.
- 535 28. Krzywinski MI, Schein JE, Birol I, Connors J, Gascoyne R, Horsman D, Jones SJ, Marra  
536 MA. 2009. Circos: An information aesthetic for comparative genomics. *Genome Res*  
537 19:1639-1645.
- 538 29. Kumar S, Stecher G, Li M, Knyaz C, Tamura K. 2018. MEGA X: Molecular Evolutionary  
539 Genetics Analysis across Computing Platforms. *Mol Biol Evol* 35:1547–1549.
- 540 30. Sievers F, Wilm A, Dineen D, Gibson TJ, Karplus K, Li W, Lopez R, McWilliam H,  
541 Remmert M, Söding J, Thompson JD, Higgins DG. 2011. Fast, scalable generation of  
542 high-quality protein multiple sequence alignments using Clustal Omega. *Mol Syst Biol*  
543 7:539.
- 544 31. Lethiec F, Gascuel O, Duroux P, Guindon S. 2005. PHYML Online—a web server for fast  
545 maximum likelihood-based phylogenetic inference. *Nucleic Acids Res* 33:W557–W559.
- 546 32. Meier-Kolthoff JP, Göker M. 2019. TYGS is an automated high-throughput platform for

- 547 state-of-the-art genome-based taxonomy. *Nat Commun* 10:2182.
- 548 33. Jain C, Rodriguez-R LM, Phillippy AM, Konstantinidis KT, Aluru S. 2018. High  
549 throughput ANI analysis of 90K prokaryotic genomes reveals clear species boundaries.  
550 *Nat Commun* 9:5114.
- 551 34. Kolde R. 2015. pheatmap : Pretty Heatmaps. R package version 1.0.12. R Package version  
552 108.
- 553 35. Darling ACE, Mau B, Blattner FR, Perna NT. 2004. Mauve: Multiple alignment of  
554 conserved genomic sequence with rearrangements. *Genome Res* 7:1394-403.
- 555 36. Robertson J, Nash JHE. 2018. MOB-suite: software tools for clustering, reconstruction  
556 and typing of plasmids from draft assemblies. *Microb genomics* 4:8.
- 557 37. Bolger AM, Lohse M, Usadel B. 2014. Trimmomatic: A flexible trimmer for Illumina  
558 Sequence Data. *Bioinformatics* 30(15):2114-2120.
- 559 38. Li H.; Durbin R. 2009. Fast and accurate short read alignment with Burrows–Wheeler  
560 transform. *Bioinformatics* 25:1754–1760.
- 561 39. Li H, Handsaker B, Wysoker A, Fennell T, Ruan J, Homer N, Marth G, Abecasis G,  
562 Durbin R. 2009. The Sequence Alignment/Map format and SAMtools. *Bioinformatics*  
563 25(16):2078-9.
- 564 40. Quinlan AR, Hall IM. 2010. BEDTools: a flexible suite of utilities for comparing genomic  
565 features. *Bioinformatics* 26:841–842.
- 566 41. Olasz F, Stalder R, Arber W. 1993. Formation of the tandem repeat (IS 30)<sub>2</sub> and its role in  
567 IS 30-mediated transpositional DNA rearrangements. *MGG Mol Gen Genet* 239:177-187.

- 568 42. Olasz F, Farkas T, Kiss J, Arini A, Arber W. 1997. Terminal inverted repeats of insertion  
569 sequence IS30 serve as targets for transposition. *J Bacteriol* 179(23):7551-8.
- 570 43. Schultz-Jensen N, Knudsen BE, Frkova Z, Aamand J, Johansen T, Thykaer J, Sørensen  
571 SR. 2014. Large-scale bioreactor production of the herbicide-degrading *Aminobacter* sp.  
572 strain MSH1. *Appl Microbiol Biotechnol* 98:2335-2344.
- 573 44. Harayama S, Mermoud N, Rekik M, Lehrbach PR, Timmis KN. 1987. Roles of the  
574 divergent branches of the meta-cleavage pathway in the degradation of benzoate and  
575 substituted benzoates. *J Bacteriol* 169(2):558-64.
- 576 45. Zheng L, Kostrewa D, Bernèche S, Winkler FK, Li XD. 2004. The mechanism of  
577 ammonia transport based on the crystal structure of AmtB of *Escherichia coli*. *Proc Natl*  
578 *Acad Sci U S A* 101(49):17090-17095.
- 579 46. Sparacino-Watkins C, Stolz JF, Basu P. 2014. Nitrate and periplasmic nitrate reductases.  
580 *Chem Soc Rev* 43(2):676-706.
- 581 47. Bedzyk L, Wang T, Ye RW. 1999. The periplasmic nitrate reductase in *Pseudomonas* sp.  
582 strain G-179 catalyzes the first step of denitrification. *J Bacteriol* 181(9):2802-6.
- 583 48. Kawano Y, Suzuki K, Ohtsu I. 2018. Current understanding of sulfur assimilation  
584 metabolism to biosynthesize l-cysteine and recent progress of its fermentative  
585 overproduction in microorganisms. *Appl Microbiol Biotechnol* 102(19):8203-8211.
- 586 49. Raes B, Horemans B, Rentsch D, T'Syen J, Ghequire M, De Mot R, Wattiez R, Kohler H-  
587 P, Springael D. 2019. *Aminobacter* sp. MSH1 mineralises the groundwater micropollutant  
588 2,6-dichlorobenzamide through a unique chlorobenzoate catabolic pathway. *Environ Sci*  
589 *Technol* 53:10146–10156.

- 590 50. Vandermaesen J, Horemans B, Degryse J, Boonen J, Walravens E, Springael D. 2016.  
591 Mineralization of the Common Groundwater Pollutant 2,6-Dichlorobenzamide (BAM)  
592 and its Metabolite 2,6-Dichlorobenzoic Acid (2,6-DCBA) in Sand Filter Units of Drinking  
593 Water Treatment Plants. *Environ Sci Technol* 50(18):10114-10122.
- 594 51. Cevallos MA, Cervantes-Rivera R, Gutiérrez-Ríos RM. 2008. The *repABC* plasmid  
595 family. *Plasmid* 60(1):19-37.
- 596 52. González V, Santamaría RI, Bustos P, Hernández-González I, Medrano-Soto A, Moreno-  
597 Hagelsieb G, Janga SC, Ramírez MA, Jiménez-Jacinto V, Collado-Vides J, Dávila G.  
598 2006. The partitioned *Rhizobium etli* genome: Genetic and metabolic redundancy in seven  
599 interacting replicons. *Proc Natl Acad Sci U S A* 103(10):3834-3839.
- 600 53. Castillo-Ramírez S, Vázquez-Castellanos JF, González V, Cevallos MA. 2009. Horizontal  
601 gene transfer and diverse functional constrains within a common replication-partitioning  
602 system in Alphaproteobacteria: The *repABC* operon. *BMC Genomics* 10:536.
- 603 54. Cascales E, Christie PJ. 2003. The versatile bacterial type IV secretion systems. *Nat Rev*  
604 *Microbiol* 1:137–149.
- 605 55. Pecoraro V, Zerulla K, Lange C, Soppa J. 2011. Quantification of Ploidy in Proteobacteria  
606 Revealed the Existence of Monoploid, (Mero-)Oligoploid and Polyploid Species. *PLoS*  
607 *One* 6:e16392.
- 608 56. Albers P, Lood C, Öztürk B, Horemans B, Lavigne R, van Noort V, De Mot R, Marchal  
609 K, Sanchez-Rodriguez A, Springael D. 2018. Catabolic task division between two near-  
610 isogenic subpopulations co-existing in a herbicide-degrading bacterial consortium:  
611 consequences for the interspecies consortium metabolic model. *Environ Microbiol* 20:85–

612            96.

613

614 **Tables**

615 **Table 1.** Genome accession codes

| Label           | Size (Mb) | GC (%) | Topology | INSDC identifier        | RefSeq ID                     |
|-----------------|-----------|--------|----------|-------------------------|-------------------------------|
| Chromosome      | 5.30      | 63.2   | Circular | CP028968.1(CP026265.1)* | NZ_CP028968.1(NZ_CP026265.1)* |
| Plasmid 1 pBAM1 | 0.04      | 64.4   | Circular | CP028967.1(CP026268.1)* | NZ_CP028967.1(NZ_CP026268.1)* |
| Plasmid 2 pBAM2 | 0.05      | 56.0   | Circular | CP028966.1(CP026267.1)* | NZ_CP028966.1(NZ_CP026267.1)* |
| Plasmid 3 pUSP1 | 0.37      | 63.1   | Circular | CP028969.1(CP026266.1)* | NZ_CP028969.1(NZ_CP026266.1)* |
| Plasmid 4 pUSP2 | 0.37      | 60.1   | Circular | CP028970.1              | NZ_CP028970.1                 |
| Plasmid 5 pUSP3 | 0.10      | 60.5   | Circular | CP028971.1              | NZ_CP028971.1                 |
| Plasmid 6 pUSP4 | 0.06      | 61.9   | Circular | CP028972.1              | NZ_CP028972.1                 |
| Plasmid 7 pUSP5 | 0.03      | 62.9   | Circular | CP028973.1              | NZ_CP028973.1                 |

616 \* INSDC identifier and RefSeqID of KU Leuven substrain MK1 submission in brackets

617

618 **Table 2.** Genome statistics based on substrain MK1.

| Attribute                      | Value   | % of Total |
|--------------------------------|---------|------------|
| Genome size (bp)               | 6321606 | 100.0      |
| DNA coding (bp)                | 5587258 | 88.4       |
| DNA G+C (bp)                   | 3976162 | 62.9       |
| DNA scaffolds                  | 8       | 100.0      |
| Total genes                    | 6257    | 100.0      |
| Protein coding genes           | 6004    | 96.0       |
| RNA genes                      | 63      | 1.0        |
| Pseudo genes                   | 190     | 3.0        |
| Genes with function prediction | 5182    | 75.9       |
| Genes assigned to COGs         | 3890    | 62.2       |

|                                  |      |                        |
|----------------------------------|------|------------------------|
| Genes with Pfam domains          | 5006 | <del>609</del>         |
| Genes with signal peptides       | 565  | 9.0                    |
| Genes with transmembrane helices | 1423 | <del>620</del><br>22.7 |
| CRISPR repeats                   | 0    | <del>0.0</del><br>621  |

---

622

623

624

625

626

627

628 **Table 3.** Percentage of genes associated with general COG functional categories in genome and replicons.

| Code       | Description                                                  | Total       | Chr         | pBAM1     | pBAM2     | pUSP1      | pUSP2      | pUSP3      | pUSP4     | pUSP5     |
|------------|--------------------------------------------------------------|-------------|-------------|-----------|-----------|------------|------------|------------|-----------|-----------|
| J          | Translation, ribosomal structure and biogenesis              | 2.9%        | 3%          | 0%        | 0%        | 2%         | 1%         | 0%         | 0%        | 0%        |
| A          | RNA processing and modification                              | 0.0%        | 0%          | 0%        | 0%        | 0%         | 0%         | 0%         | 0%        | 0%        |
| K          | Transcription                                                | 7.3%        | 7%          | 5%        | 9%        | 10%        | 7%         | 9%         | 5%        | 18%       |
| L          | Replication, recombination and repair                        | 4.9%        | 4%          | 20%       | 21%       | 2%         | 12%        | 14%        | 16%       | 18%       |
| B          | Chromatin structure and dynamics                             | 0.1%        | 0%          | 0%        | 0%        | 0%         | 0%         | 0%         | 0%        | 0%        |
| D          | Cell cycle control, Cell division, chromosome partitioning   | 0.7%        | 1%          | 2%        | 2%        | 2%         | 1%         | 2%         | 3%        | 6%        |
| V          | Defense mechanisms                                           | 1.0%        | 1%          | 0%        | 0%        | 0%         | 1%         | 0%         | 2%        | 0%        |
| T          | Signal transduction mechanisms                               | 2.5%        | 3%          | 0%        | 0%        | 1%         | 1%         | 0%         | 3%        | 3%        |
| M          | Cell wall/membrane biogenesis                                | 3.8%        | 4%          | 0%        | 0%        | 2%         | 1%         | 2%         | 2%        | 0%        |
| N          | Cell motility                                                | 0.6%        | 1%          | 0%        | 0%        | 0%         | 0%         | 0%         | 0%        | 0%        |
| U          | Intracellular trafficking and secretion                      | 2.5%        | 2%          | 24%       | 17%       | 0%         | 3%         | 11%        | 22%       | 3%        |
| O          | Posttranslational modification, protein turnover, chaperones | 3.0%        | 3%          | 0%        | 17%       | 1%         | 0%         | 0%         | 0%        | 0%        |
| C          | Energy production and conversion                             | 5.1%        | 5%          | 2%        | 2%        | 9%         | 8%         | 5%         | 2%        | 12%       |
| G          | Carbohydrate transport and metabolism                        | 4.1%        | 4%          | 0%        | 6%        | 6%         | 6%         | 2%         | 2%        | 0%        |
| E          | Amino acid transport and metabolism                          | 9.8%        | 9%          | 2%        | 2%        | 20%        | 12%        | 7%         | 6%        | 0%        |
| F          | Nucleotide transport and metabolism                          | 1.6%        | 2%          | 0%        | 0%        | 1%         | 0%         | 0%         | 0%        | 0%        |
| H          | Coenzyme transport and metabolism                            | 2.3%        | 3%          | 0%        | 0%        | 2%         | 1%         | 0%         | 0%        | 0%        |
| I          | Lipid transport and metabolism                               | 2.3%        | 2%          | 0%        | 0%        | 2%         | 5%         | 3%         | 0%        | 3%        |
| P          | Inorganic ion transport and metabolism                       | 5.8%        | 6%          | 0%        | 0%        | 10%        | 3%         | 0%         | 0%        | 3%        |
| Q          | Secondary metabolites biosynthesis, transport and catabolism | 1.9%        | 2%          | 5%        | 4%        | 5%         | 6%         | 1%         | 0%        | 0%        |
| R          | General function prediction only                             | 0.0%        | 0%          | 0%        | 0%        | 0%         | 0%         | 0%         | 0%        | 0%        |
| S          | Function unknown                                             | 20.7%       | 21%         | 10%       | 13%       | 17%        | 21%        | 17%        | 5%        | 21%       |
| -          | Not in COGs                                                  | 16.9%       | 17%         | 29%       | 8%        | 9%         | 12%        | 27%        | 33%       | 15%       |
| <b>CDS</b> |                                                              | <b>6237</b> | <b>5277</b> | <b>41</b> | <b>53</b> | <b>322</b> | <b>346</b> | <b>100</b> | <b>63</b> | <b>34</b> |



630 **Figures**

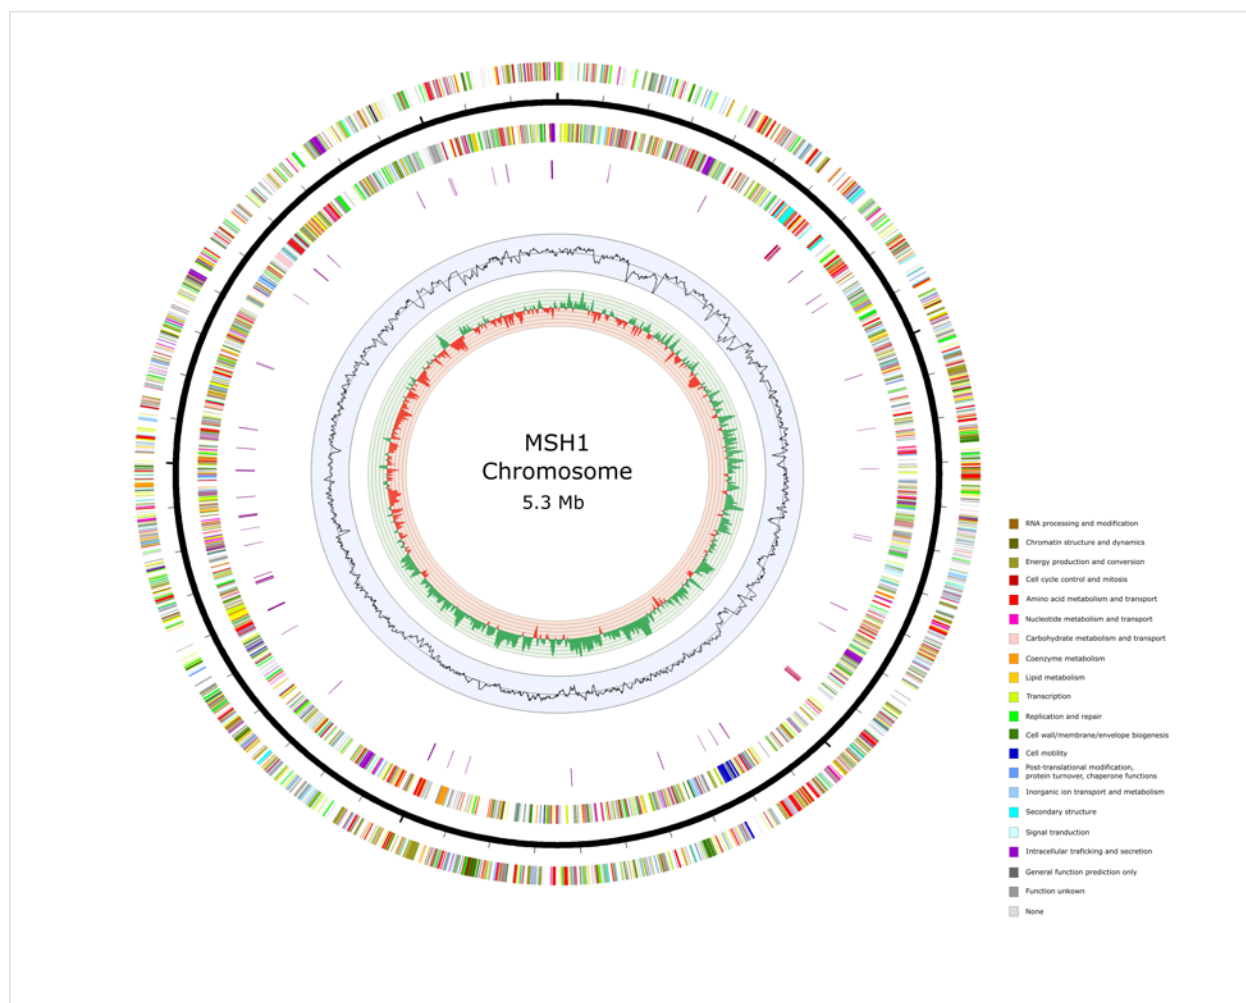

631

632 **Figure 1.** Circular view of the chromosome of *Aminobacter* sp. MSH1. From outer to inner circle:  
633 CDS on leading strand, scale (ticks: 100 kb), CDS on lagging strand, tRNA (purple) and rRNA  
634 (red) (only chromosome), GC plot and GC skew (>0: green, <0: red). CDS are colored according  
635 to COG functional categories determined with EggNOG mapper 4.5.1.

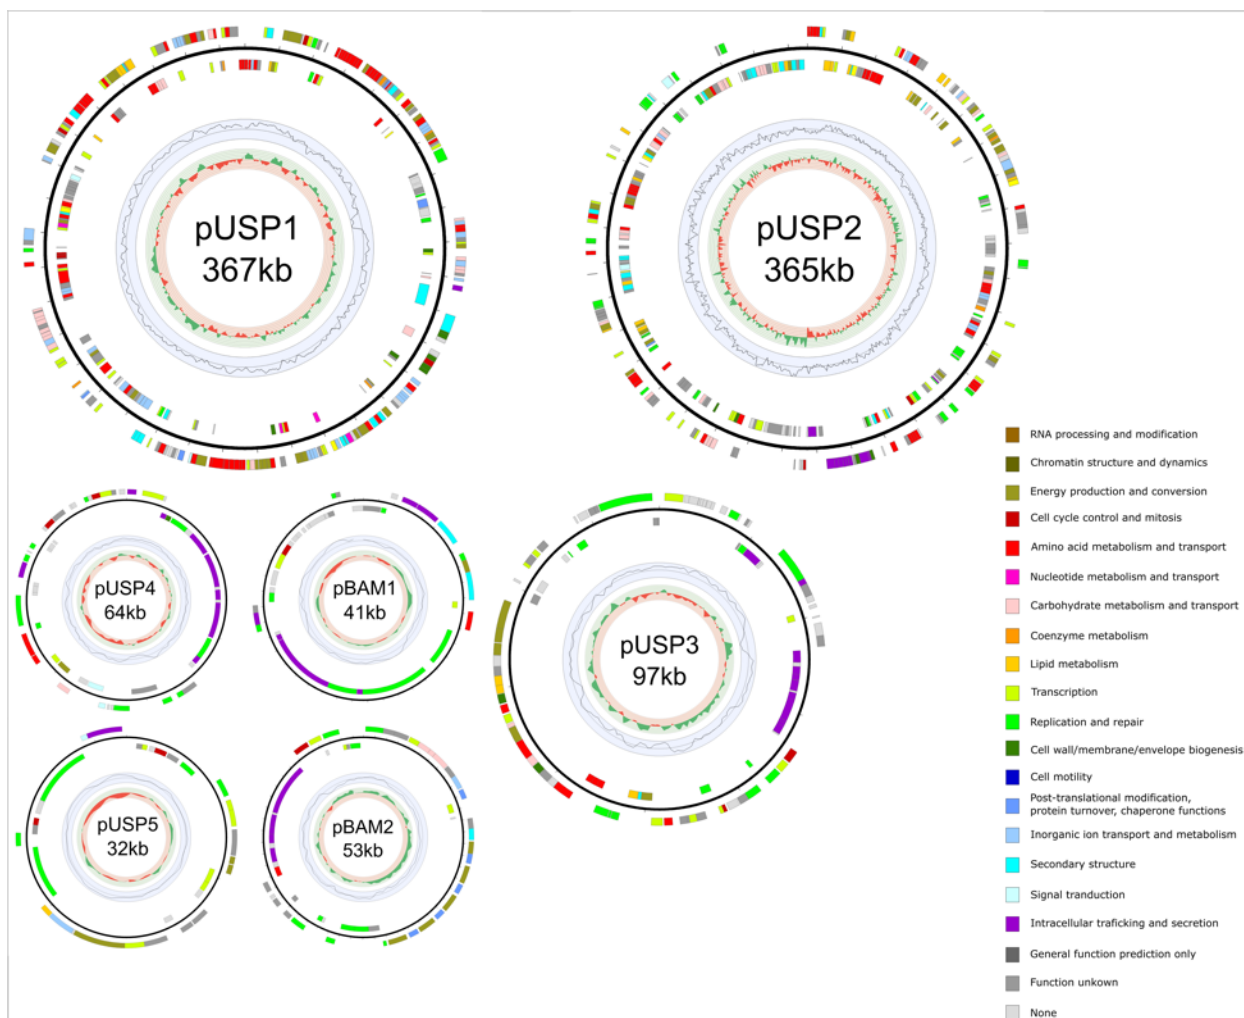

637 **Figure 2.** Circular view of the plasmids of the newly assigned *Aminobacter niigataensis* MSH1.  
638 From outer to inner circle: CDS on leading strand, scale (ticks: 100 kb), CDS on lagging strand,  
639 GC plot and GC skew (>0: green, <0: red). CDS are colored according to COG functional  
640 categories determined with EggNOG mapper 4.5.1. The KU Leuven substrain MK1 lacks plasmids  
641 pUSP2-5.

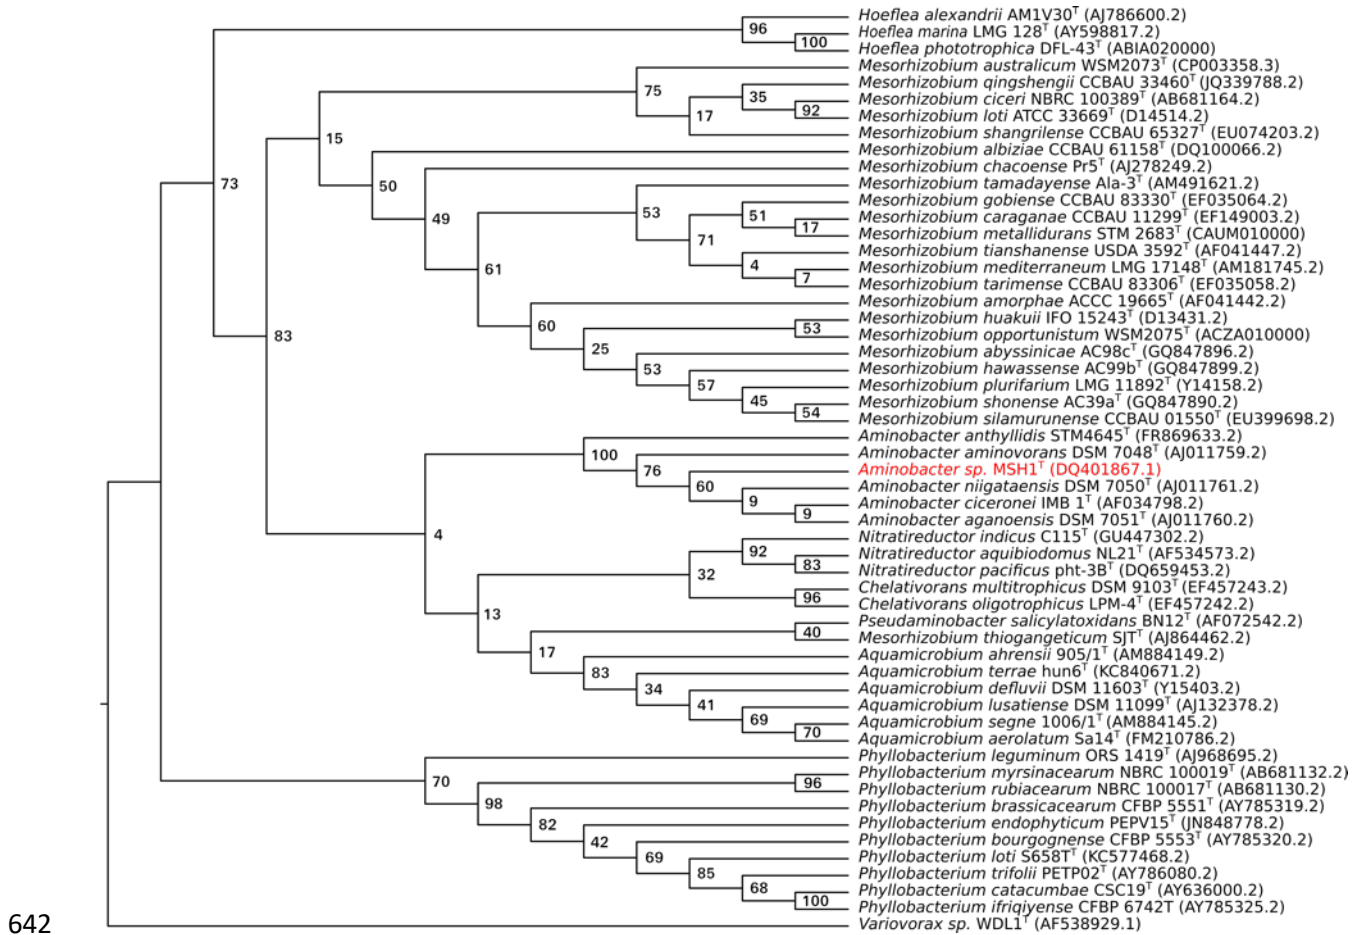

643 **Figure 3.** Phylogenetic relationships of *Aminobacter niigataensis* MSH1 based on the 16S rRNA  
644 gene sequence. Maximum likelihood tree visualized as a cladogram with bootstrap values. This tree  
645 was created from a clustal-omega (30) multiple sequence alignment using 16S rRNA genes from  
646 the set of type strains available in the *Phyllobacteriaceae* family (NCBI accession numbers  
647 between parenthesis). The tree was inferred using PhyML (31) with a GTR substitution model and  
648 a calculation of branch support values (bootstrap value of 1000). The *Variovorax* sp. strain WDL1  
649 was used as an outgroup (56).

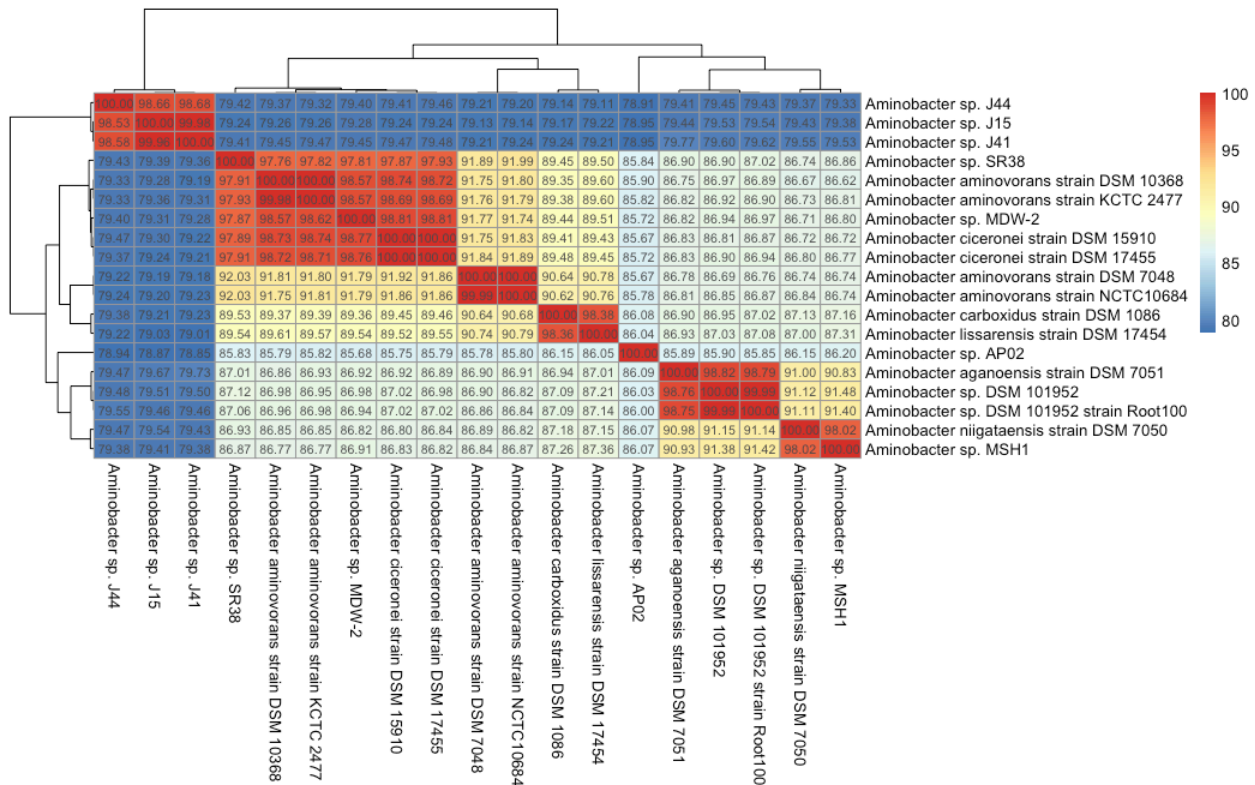

650

651 **Figure 4.** Heatmap of ANI values for all available *Aminobacter* genomes from NCBI (downloaded  
 652 January 31, 2021). Genomes are clustered using hierarchical clustering of ANI values, as implemented in  
 653 the R package “pheatmap” (v1.0.12).

654

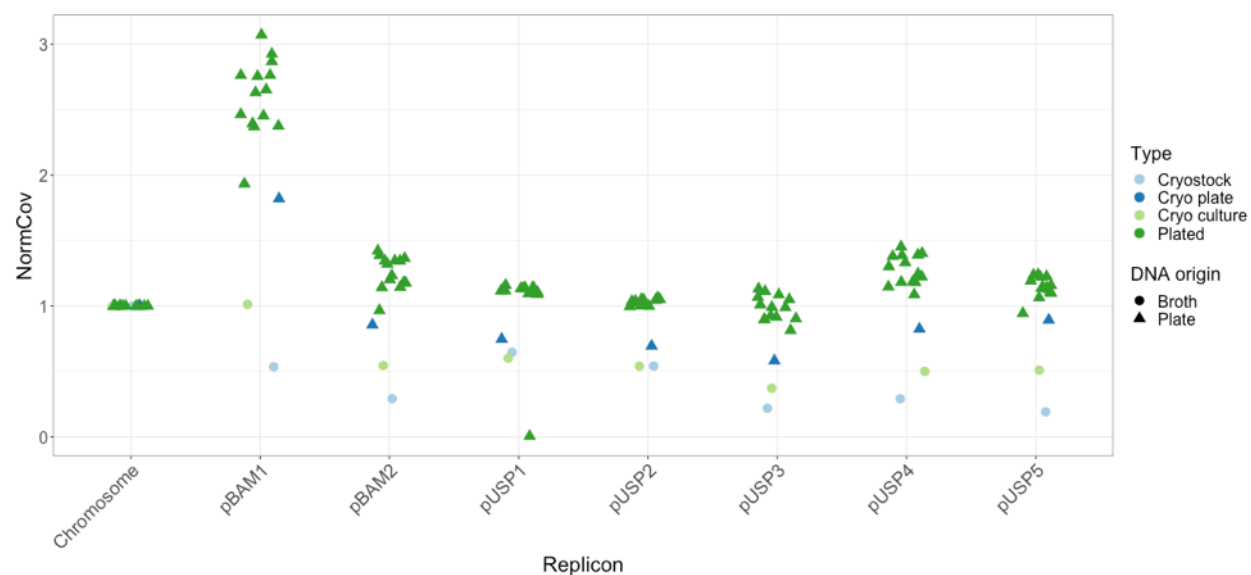

655

656 **Figure 5.** Coverage of replicons normalized to chromosome coverage (NormCov). A NormCov of 1  
657 indicates a single copy per chromosome of a replicon. A NormCov above 1 indicates that there are more  
658 copies of a given plasmid than the chromosome per cell. Points have been slightly jittered horizontally to  
659 improve visualization of overlaps.

660



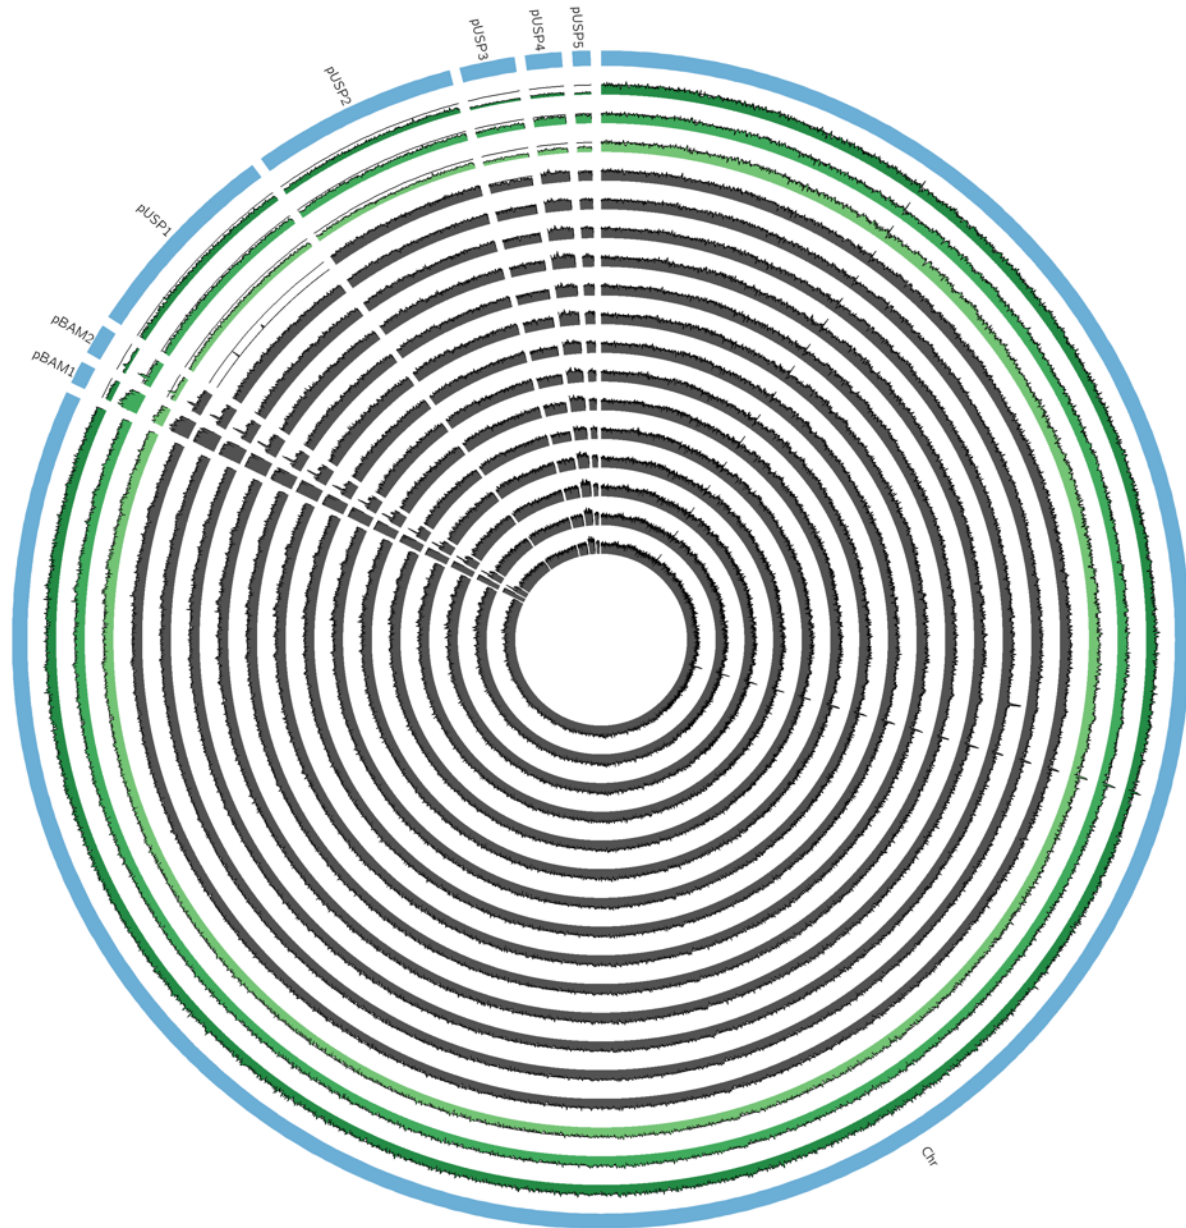

661

662 **Figure 6.** Illumina reads mapped to the chromosome and plasmids of MSH1 (DK1 substrain). The  
663 outer blue ring indicates the replicons. The inner rings show read mapping coverage of the  
664 replicons, normalized to the coverage of the chromosome per replicate, for all of the 17 sequenced  
665 replicates. The three first green rings show replicates cryostock, first colony from R2A plate, first  
666 colony from R2B broth, respectively. The subsequent 14 grey rings show the replicates that all  
667 originate from the same first colony. A solid line in the background of all tracks indicate the

668 chromosome coverage line. Coverage above this line indicates a replicon copy number higher than  
669 1 per chromosome and vice versa.

670 **Supplementary data**

671

672 **Supplementary Table S1.** Digital DNA:DNA hybridization (dDDH) results from the online Type Strain Genome Server (TYGS)  
 673 analysis. d0, d4, d6 refers to different algorithms used TYGS. Formula d0 (a.k.a. GGDC formula 1): length of all HSPs divided by total  
 674 genome length. Formula d4 (a.k.a. GGDC formula 2): sum of all identities found in HSPs divided by overall HSP length. Formula d6  
 675 (a.k.a. GGDC formula 3): sum of all identities found in HSPs divided by total genome length. C.I.: Confidence interval.

676

|              |                                          | Type Strain Genome Server |               |            |               |            |               |             |  |
|--------------|------------------------------------------|---------------------------|---------------|------------|---------------|------------|---------------|-------------|--|
| Query strain | Subject strain                           | dDDH                      | C.I.          | dDDH       | C.I.          | dDDH       | C.I.          | G+C content |  |
|              |                                          | (d0, in %)                | (d0, in %)    | (d4, in %) | (d4, in %)    | (d6, in %) | (d6, in %)    | difference  |  |
|              |                                          | (in %)                    |               |            |               |            |               |             |  |
| <b>MSH1</b>  | <i>Aminobacter niigataensis</i> DSM 7050 | 69.7                      | [65.8 - 73.3] | 82.5       | [79.7 - 85.0] | 74.3       | [70.8 - 77.5] | 0.51        |  |
| <b>MSH1</b>  | <i>Aminobacter aganoensis</i> DSM 7051   | 53.4                      | [49.9 - 56.9] | 40.2       | [37.7 - 42.7] | 50.5       | [47.5 - 53.6] | 1.01        |  |
| <b>MSH1</b>  | <i>Aminobacter lissarensis</i> DSM 17454 | 40.6                      | [37.2 - 44.0] | 30.8       | [28.4 - 33.3] | 37.4       | [34.5 - 40.5] | 0.19        |  |
| <b>MSH1</b>  | <i>Aminobacter aminovorans</i> DSM 7048  | 41.3                      | [37.9 - 44.8] | 30         | [27.6 - 32.5] | 37.7       | [34.8 - 40.8] | 0.31        |  |
| <b>MSH1</b>  | <i>Aminobacter ciceronei</i> DSM 15910   | 39.2                      | [35.8 - 42.6] | 29.8       | [27.4 - 32.3] | 36         | [33.1 - 39.1] | 0.18        |  |



|             |                                                |      |               |      |               |      |               |      |
|-------------|------------------------------------------------|------|---------------|------|---------------|------|---------------|------|
| <b>MSH1</b> | <i>Aminobacter ciceronei</i> DSM 17455         | 39.2 | [35.8 - 42.6] | 29.8 | [27.4 - 32.3] | 36   | [33.1 - 39.1] | 0.18 |
| <b>MSH1</b> | <i>Chelatobacter heintzii</i> DSM 10368        | 38.7 | [35.3 - 42.2] | 29.7 | [27.3 - 32.2] | 35.7 | [32.7 - 38.7] | 0.26 |
| <b>MSH1</b> | <i>Mesorhizobium plurifarum</i> ORS 1032       | 18.9 | [15.8 - 22.5] | 21.9 | [19.6 - 24.3] | 18.5 | [15.9 - 21.5] | 1.19 |
| <b>MSH1</b> | <i>Mesorhizobium waimense</i> ICMP 19557       | 19.1 | [16.0 - 22.7] | 21.7 | [19.5 - 24.2] | 18.7 | [16.0 - 21.7] | 0.49 |
| <b>MSH1</b> | <i>Mesorhizobium australicum</i> WSM2073       | 19.2 | [16.1 - 22.8] | 21.7 | [19.4 - 24.1] | 18.8 | [16.1 - 21.8] | 0.05 |
| <b>MSH1</b> | <i>Mesorhizobium qingshengii</i> CGMCC 1.12097 | 19.5 | [16.3 - 23.1] | 21.6 | [19.3 - 24.0] | 19   | [16.3 - 22.0] | 0.24 |
| <b>MSH1</b> | <i>Mesorhizobium sangaii</i> DSM 100039        | 19.5 | [16.3 - 23.1] | 21.6 | [19.4 - 24.1] | 18.9 | [16.3 - 22.0] | 0.51 |

677
